# Supplementary material
Source: publisher site journal article supplement (https://www.dovepress.com/article/215967)
Supplement: Supplementary file 1 [file get_supplementary_file.php]

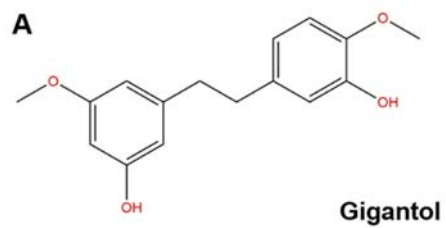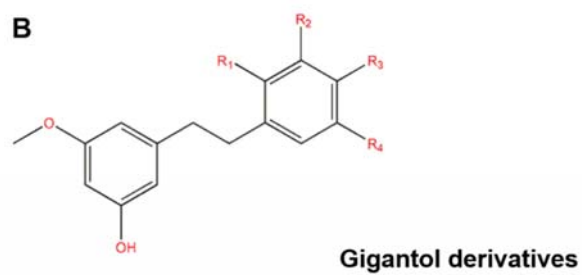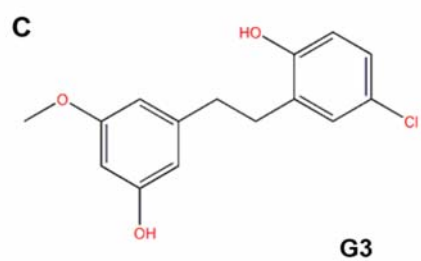

**Supplementary Figure 1** Structures of XLF inhibitor candidates.

**Notes:** (A) Structure of gigantol. (B) Structure of gigantol derivatives. (C) Structure of G3.

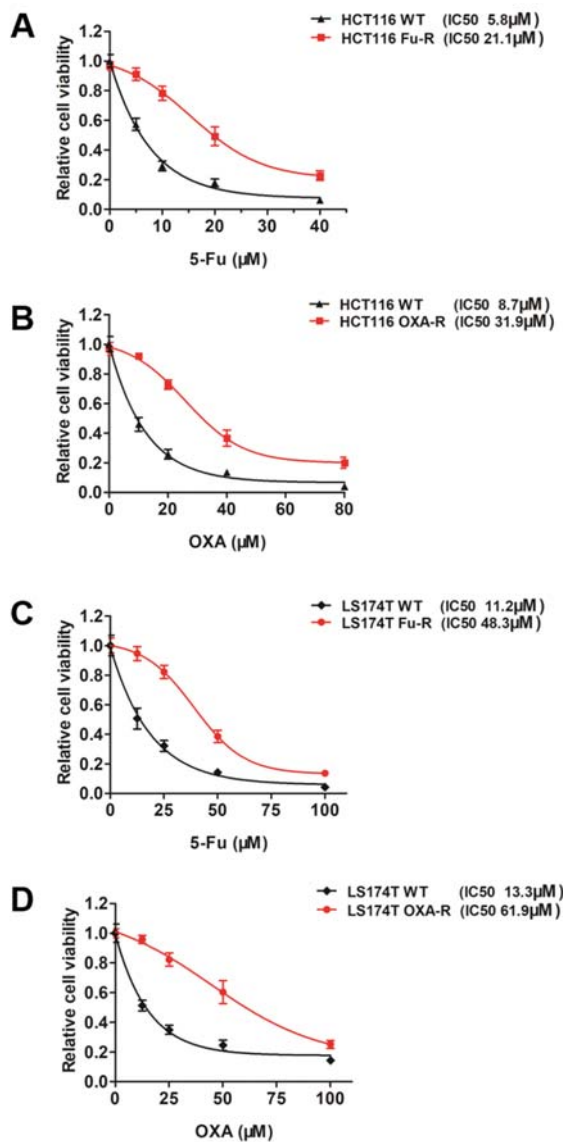

**Supplementary Figure 2** Establishment of 5-Fu and OXA resistant CRC cell lines.

**Notes:** (A) Cell sensitivity of HCT116 WT and HCT116-Fu-R to 5-Fu. Cells were treated with 5-Fu for 72 h. IC<sub>50</sub>s to 5-Fu were indicated. (B) Cell sensitivity of HCT116 WT and HCT116-OXA-R to OXA. Cells were treated with OXA for 72 h. IC<sub>50</sub>s to OXA were indicated. (C) Cell sensitivity of LS174T WT and LS174T Fu-R to 5-Fu. Cells were treated with 5-Fu for 72 h. IC<sub>50</sub>s to 5-Fu were indicated. (D) Cell sensitivity of LS174T WT and LS174T OXA-R to OXA. Cells were treated with OXA for 72 h. IC<sub>50</sub>s to OXA were indicated.
